# Supplementary material
Source: publisher figshare collection journal article supplement (https://sage.figshare.com/ndownloader/files/18005003)
Supplement: Supplementary file 1 [file 18005003]

Supplemental Table 3

*Zero-order correlations among latent variables of the seven-factor hybrid model with DAPS-2.*

|  | Avoidance | Intrusions | Negative  affect | Anhedonia | Externalizing behavior | Anxious arousal | Dysphoric arousal |
| --- | --- | --- | --- | --- | --- | --- | --- |
| Avoidance | 1.0 | - | - | - | - | - | - |
| Intrusions | .74 | 1.0 | - | - | - | - | - |
| Negative Affect | .81 | .73 | 1.0 | - | - | - | - |
| Anhedonia | .84 | .76 | .86 | 1.0 | - | - | - |
| Externalizing behavior | .82 | .74 | .87 | .91 | 1.0 | - | - |
| Anxious arousal | .84 | .79 | .85 | .92 | .87 | 1.0 | - |
| Dysphoric arousal | .85 | .81 | .87 | .99 | .88 | .96 | 1.0 |

*Note*. DAPS-2 = Detailed Assessment of Posttraumatic Stress, revised for *DSM-5*. All zero-order correlations presented in the table were significant at *p* < .001.
